# Supplementary material for: Frequency-based haplotype reconstruction from deep sequencing data of bacterial populations
Source: PubMed Central journal article supplement (PMC4652744; doi:10.1093/nar/gkv478), 2015-05-18

### Reliability

### MAE

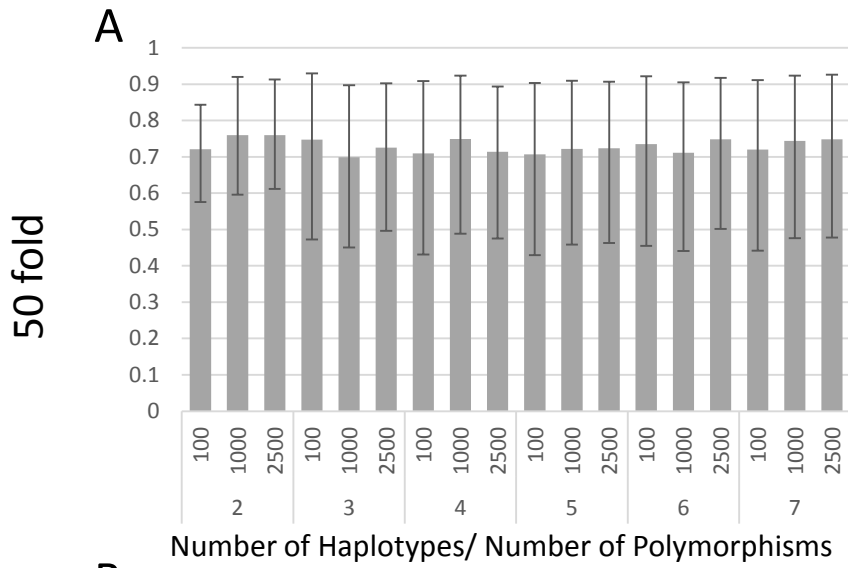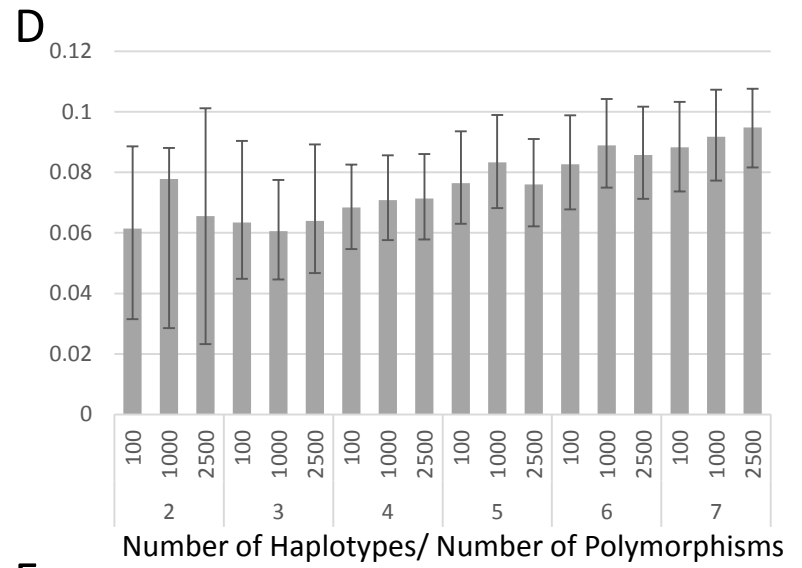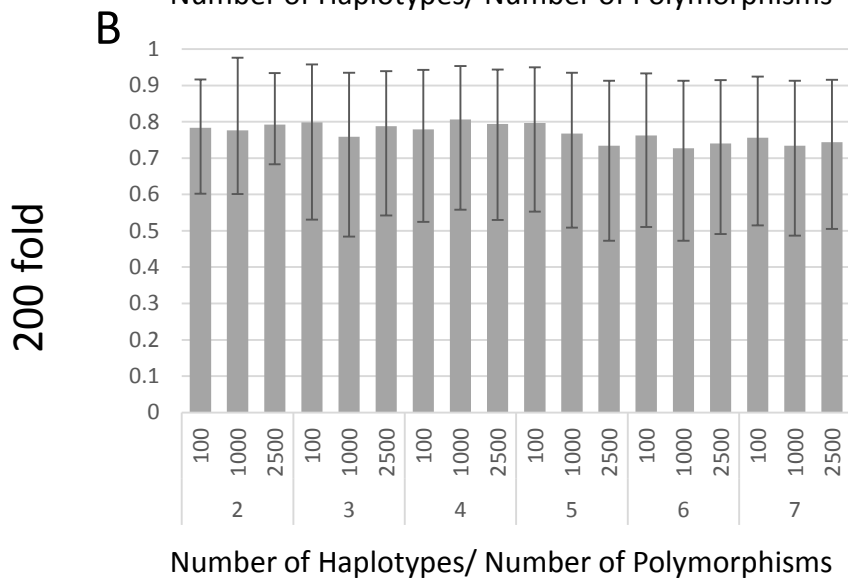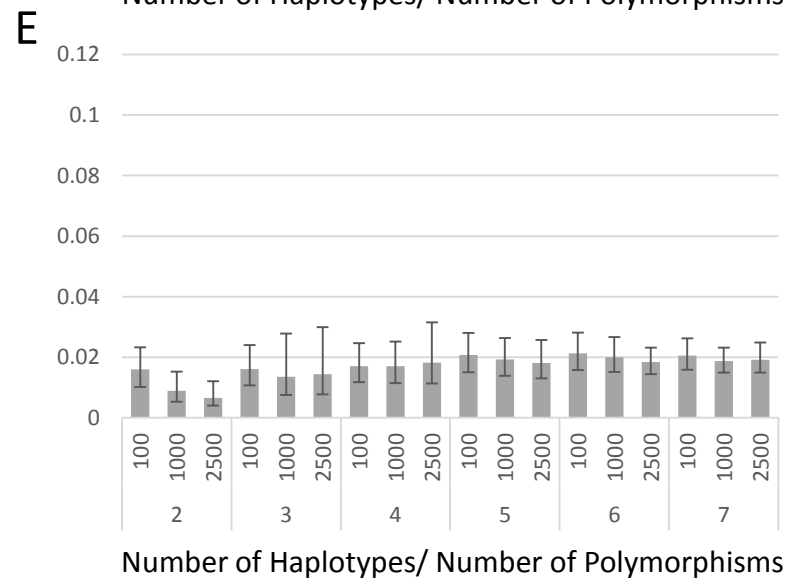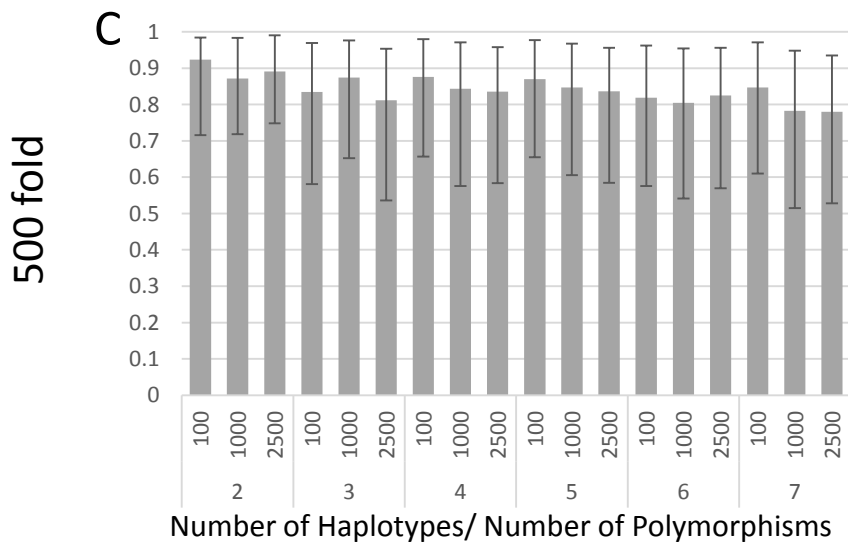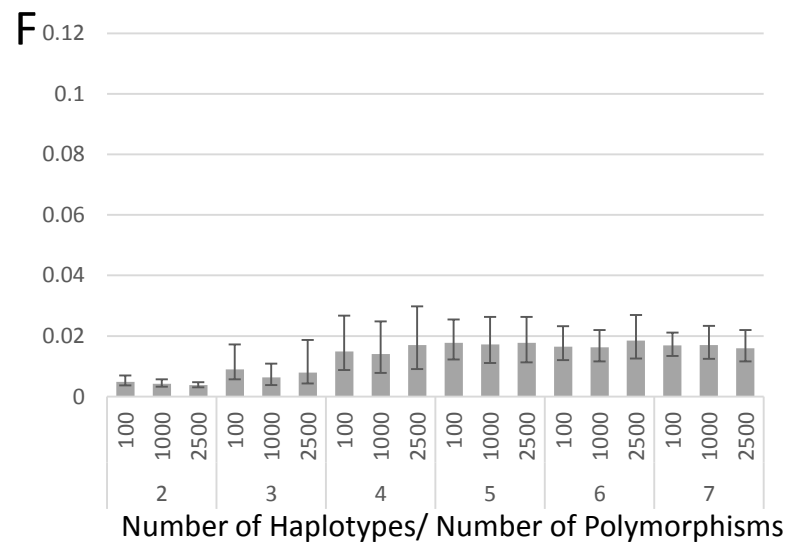

Supplement: supp_gkv478_nar-00532-met-n-2015-File011.pdf [file supp_gkv478_nar-00532-met-n-2015-File011.pdf]
